# Supplementary material for: Regulatory Role of the RUNX2 Transcription Factor in Lung Cancer Apoptosis
Source: Int J Cell Biol. 2022 Dec 3;2022:5198203. doi: 10.1155/2022/5198203 (PMC9741537; doi:10.1155/2022/5198203)
Supplement: Supplementary Materials — Supplementary Table 1: the list of primers used for RT-qPCR and ChIP assays is detailed. Supplementary Table 2: a description of clinical variables of subjects with nontumor lung tissue (NT) control and NSCLC lung cancer (LuCa). Supplementary Figure 1: shows the fluorescence quantification of RUNX2 protein expression at total cell (CTCF) (A), nuclear CTNF (B), and a nuclear/cytoplasmic ratio (C). Supplementary Figure 2: shows the expression of the cancer cell markers CD44 (A) and EpCAM (B) in LuCa and A549 cells. Supplementary Figure 3: validation data of the RUNX2 knockdown at mRNA level by RT-qPCR (A) and protein by Western blot analyses. Supplementary Figure 4: shows the dispersion diagrams (A) and quantification (B) of Annexin V/PI assays for the determination of optimal DOXO concentration for apoptosis induction in A549 cell line treated with concentrations of 0.05 µm, 0.1 µm, and 0.2 µm of DOXO for 24 h and 48 h. [file 5198203.f1.zip]

Archive with 5 entries (5 files):
- 5198203.f1/Supplementary 1.emf
- 5198203.f1/Supplementary 2.emf
- 5198203.f1/Supplementary 3.emf
- 5198203.f1/Supplementary 4.emf
- 5198203.f1/Supplementary Tables.docx
